# Supplementary material for: Role of para-substitution in controlling phosphatase activity of dinuclear NiII complexes of Mannich-base ligands: experimental and DFT studies
Source: Royal Society of Chemistry journal article supplement (doi:10.1039/c6ra08705a), 2016-01-01
Supplement: c6ra08705a1.pdf [file c6ra08705a1.pdf]

## ELECTRONIC SUPPLEMENTARY INFORMATION

### **Role of *para*-substitution in controlling phosphatase activity of dinuclear Ni<sup>II</sup> complexes of Mannich-base ligands: experimental and DFT studies<sup>†</sup>**

Ria Sanyal,<sup>a,#</sup> Xuepeng Zhang,<sup>b,#</sup> Prateeti Chakraborty,<sup>a</sup> Franz A. Mautner,<sup>c</sup> Cunyuan Zhao,<sup>\*,b</sup> and Debasis Das<sup>\*,a</sup>

<sup>a</sup>Department of Chemistry, University of Calcutta, 92 A.P.C. Road, Kolkata 700009, India. Fax: +913323519755; Tel: +913324837031; E-mail: [dasdebasis2001@yahoo.com](mailto:dasdebasis2001@yahoo.com)

<sup>b</sup>MOE Key Laboratory of Bioinorganic and Synthetic Chemistry, School of Chemistry and Chemical Engineering, Sun Yat-Sen University, Guangzhou 510275, P. R. China. E-mail: [ceszhcy@mail.sysu.edu.cn](mailto:ceszhcy@mail.sysu.edu.cn).

<sup>c</sup>Institut fuer Physikalische und Theoretische Chemie, Technische Universitaet Graz, A-8010 Graz, Austria

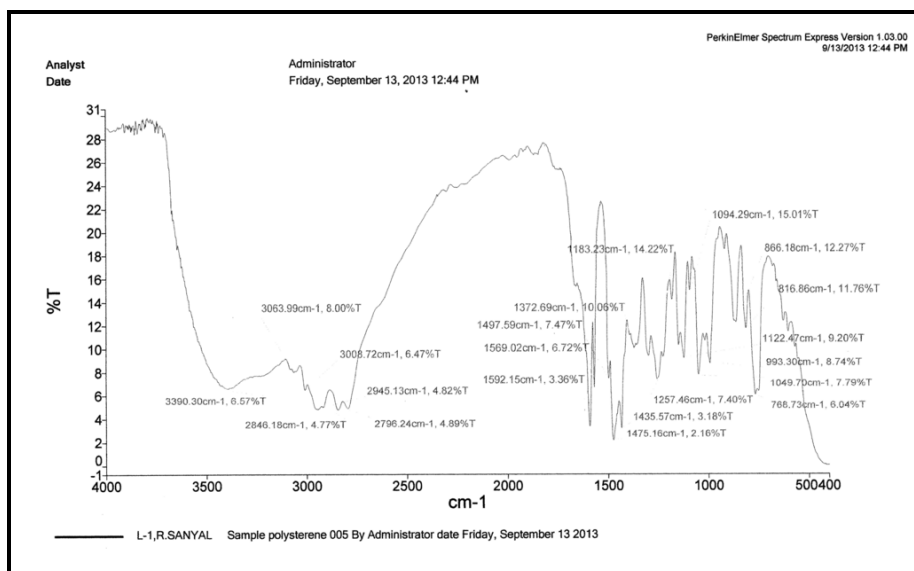

**Fig. S1** FTIR spectrum of ligand **HL**<sup>1</sup> in NaCl plate.

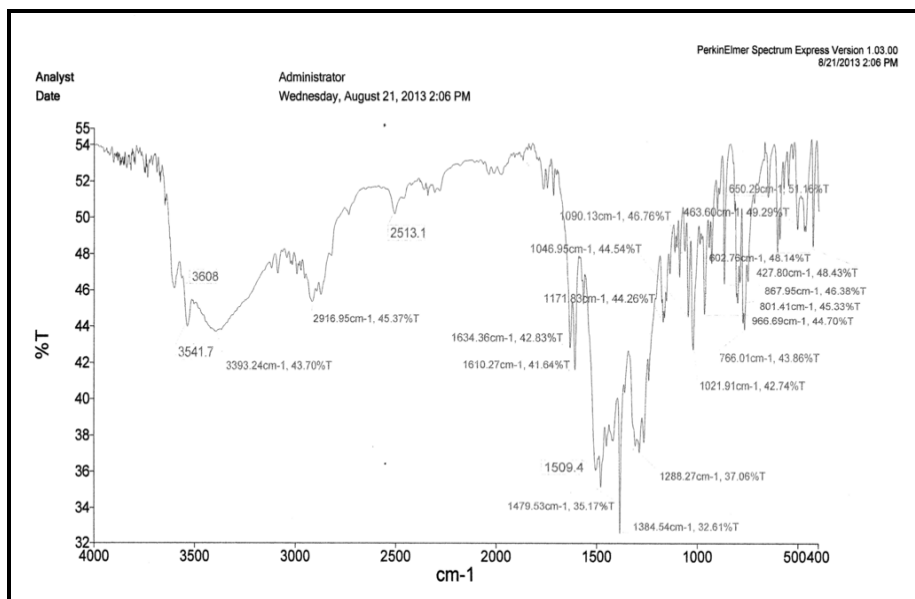

**Fig. S2** FTIR spectrum of complex 1 in KBr pellet.

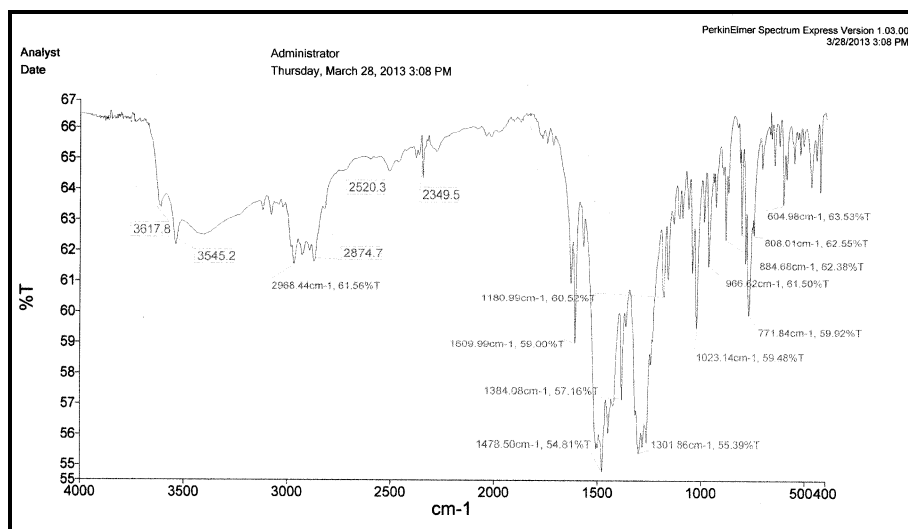

**Fig. S3** FTIR spectrum of complex 2 in KBr pellet.

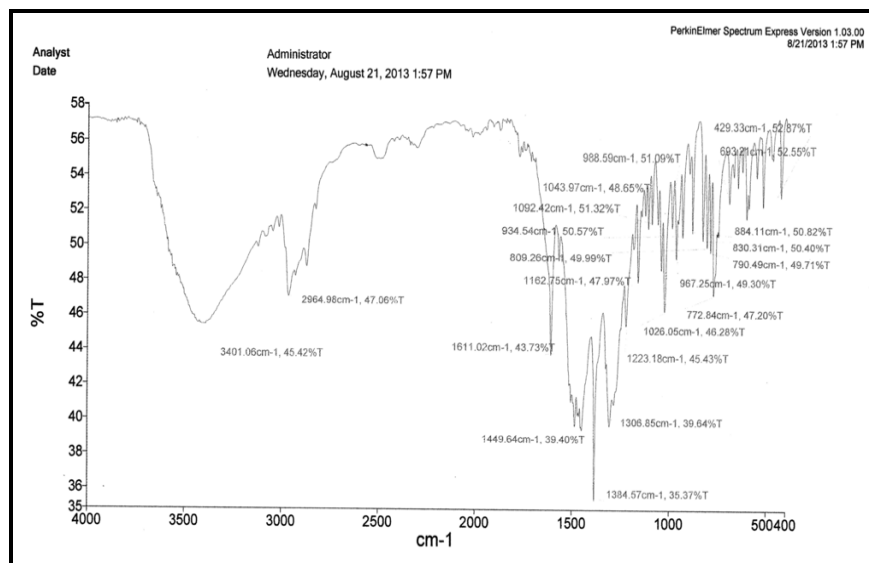

**Fig. S4** FTIR spectrum of complex **3** in KBr pellet.

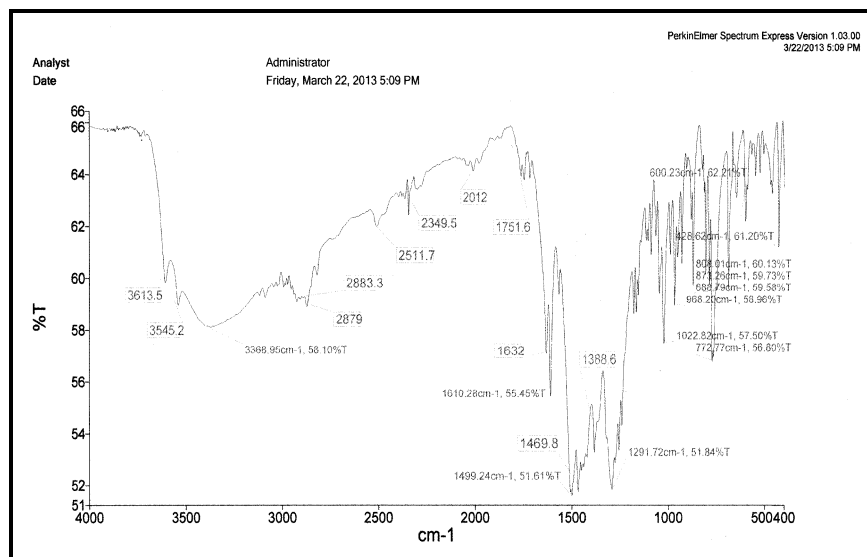

**Fig. S5** FTIR spectrum of complex **4** in KBr pellet.

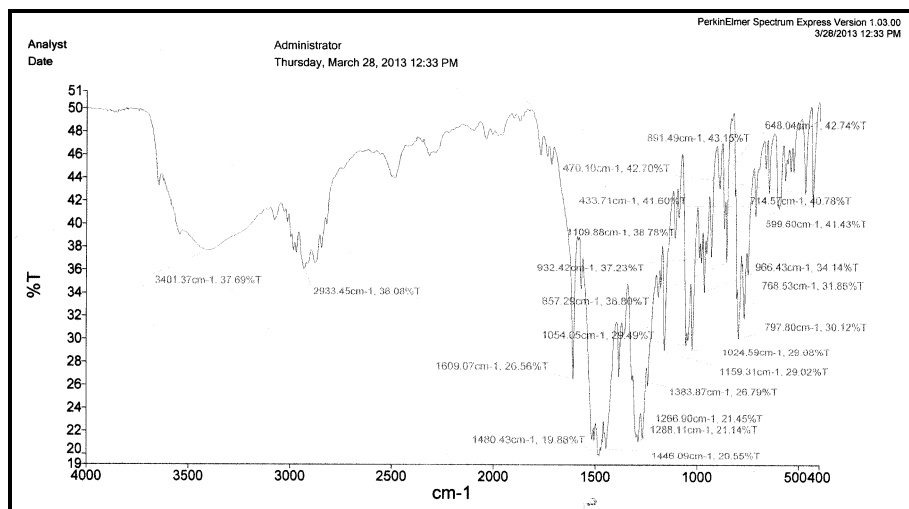

**Fig. S6** FTIR spectrum of complex **5** in KBr pellet.

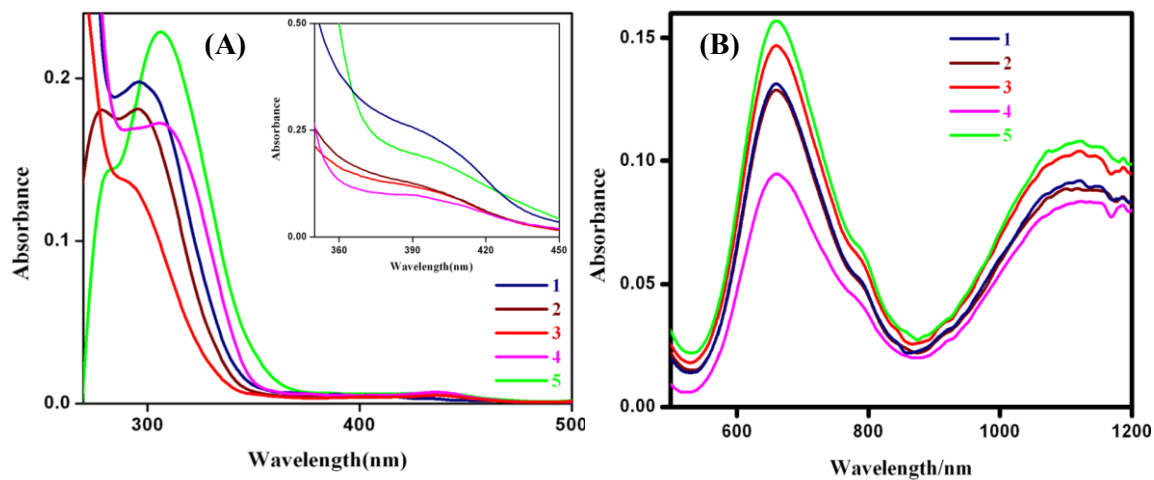

**Fig. S7** Electronic spectra of complexes in DMSO of **(A)**  $5 \times 10^{-5}$  (M) where inset shows the same for  $1 \times 10^{-3}$  (M) and **(B)**  $5 \times 10^{-3}$  (M) solution at 298 K.

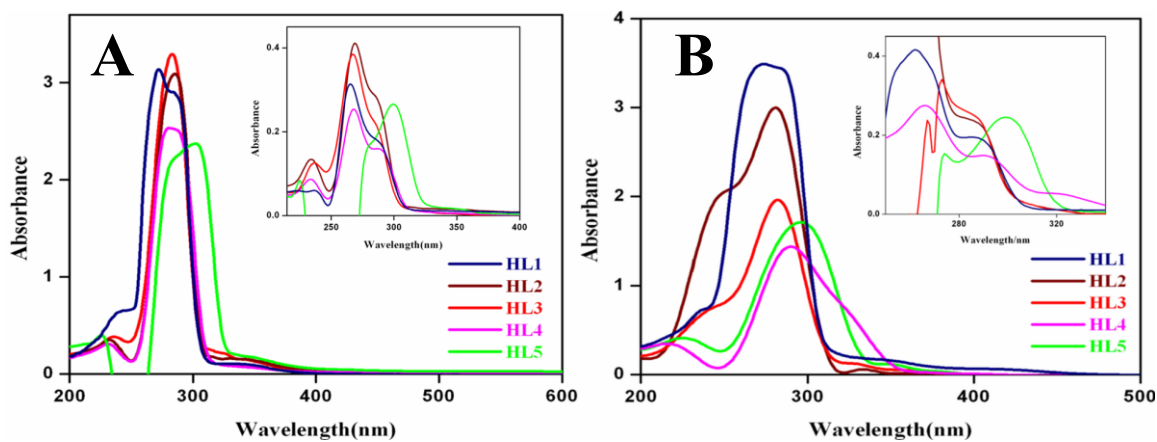

**Fig. S8** Electronic spectra of the free ligands of  $5 \times 10^{-5}$  (M) in (A) DMSO and (B) 75% DMSO solution at 298 K. Inset shows the same for  $10^{-3}$  (M) solution.

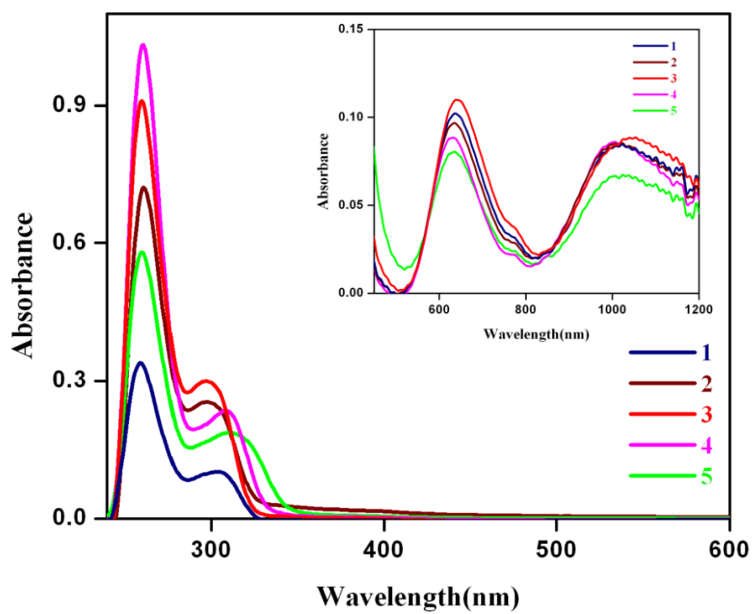

**Fig. S9** Electronic spectra of complexes in 75% DMSO of  $5 \times 10^{-5}$  (M) solution at 298 K. Inset shows the same for  $5 \times 10^{-3}$  (M) solution.

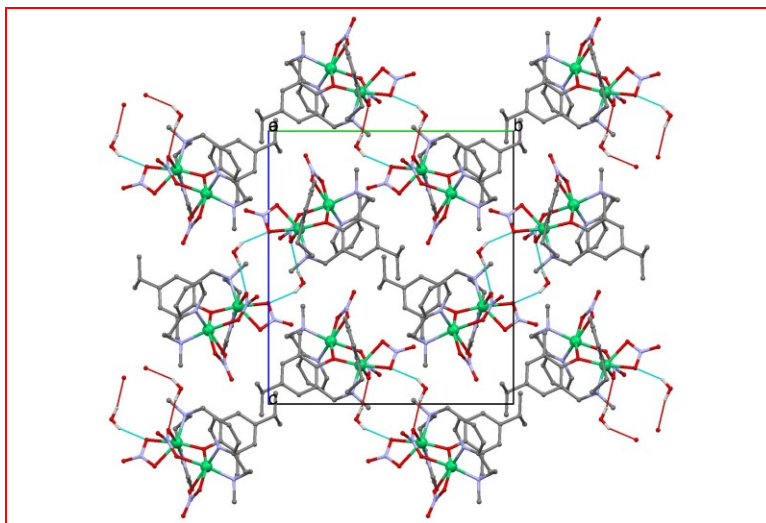

**Fig. S10** Packing plot of complex 2.

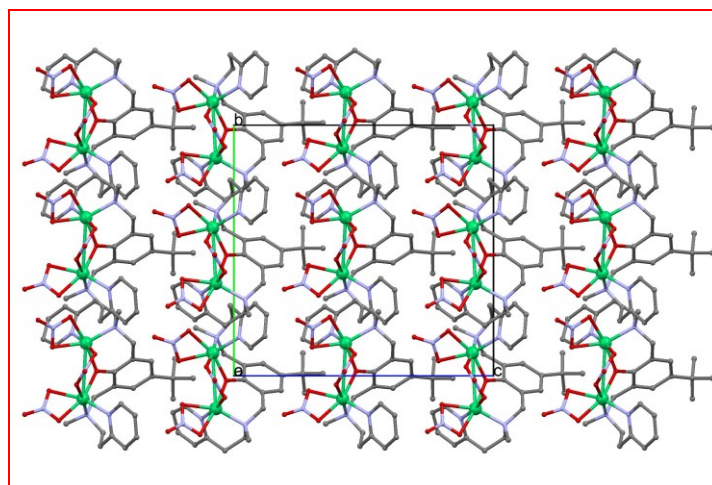

**Fig. S11** Packing plot of complex 3.

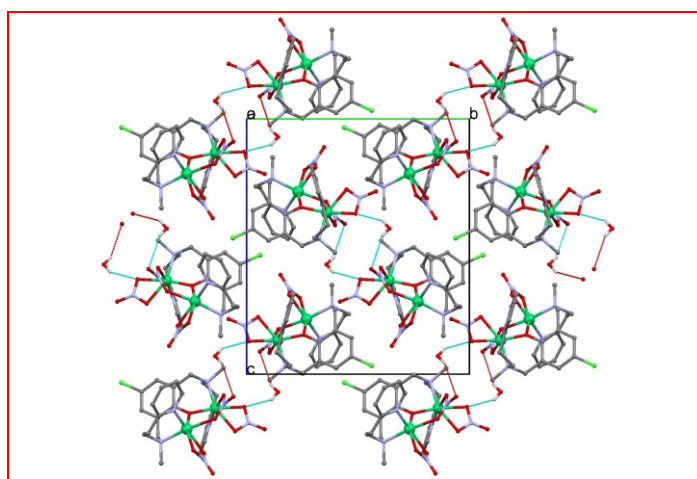

**Fig. S12** Packing plot of complex 4.

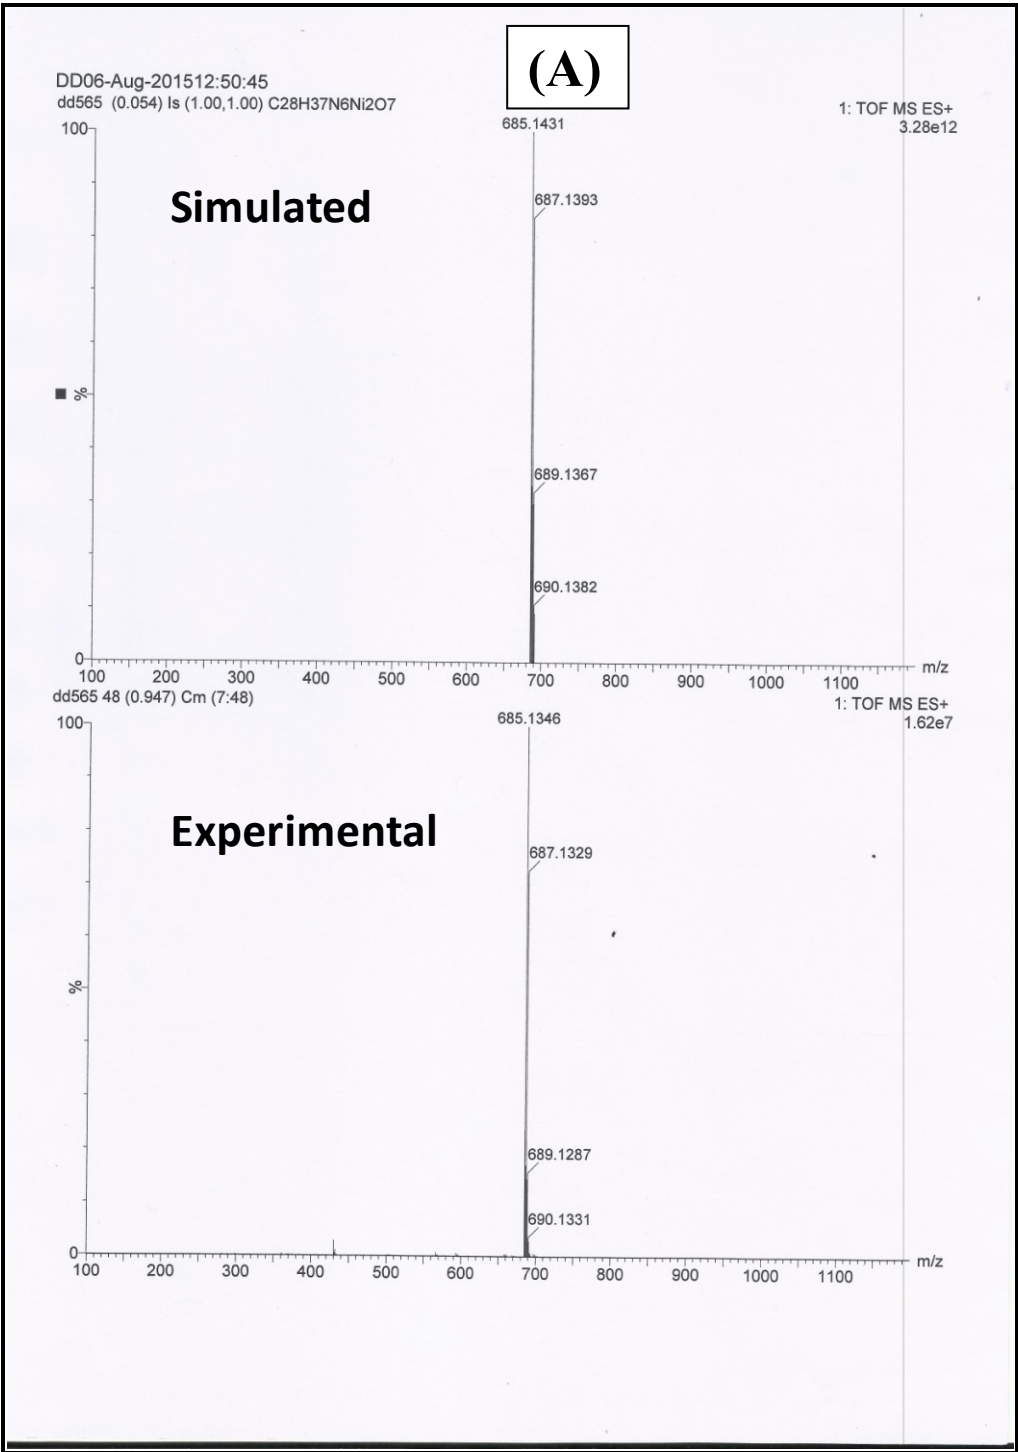

(B)

DD06-Aug-2015 12:50:45  
dd565 (0.054) Is (1.00,1.00) C<sub>28</sub>H<sub>37</sub>N<sub>6</sub>O<sub>7</sub>

1: TOF MS ES+  
3.28e12

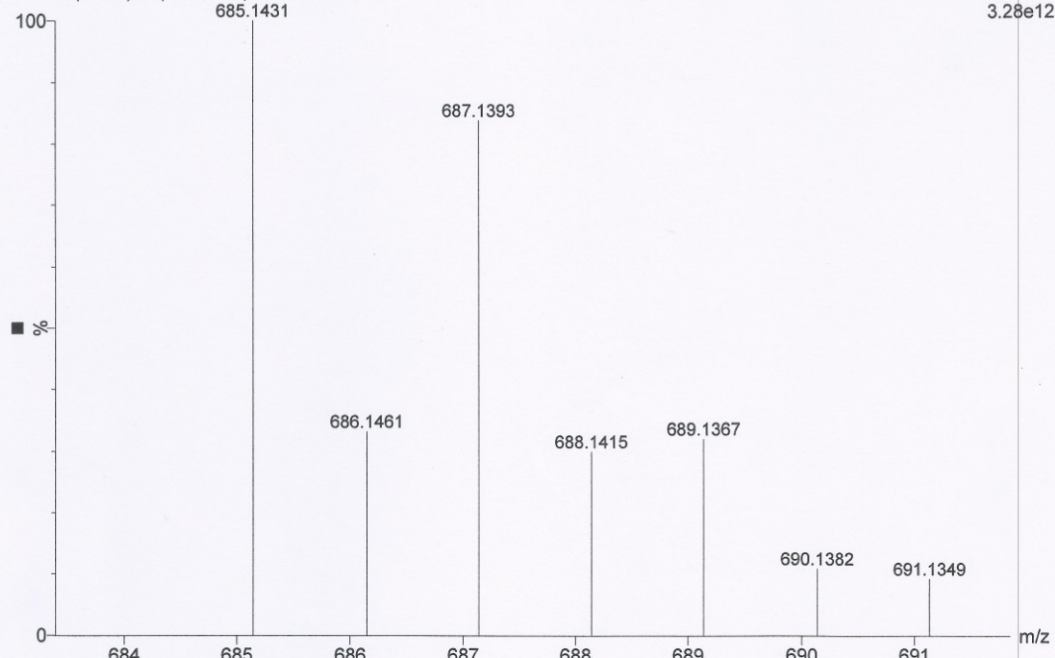

dd565 12 (0.259) Cm (12:24)

1: TOF MS ES+  
5.22e6

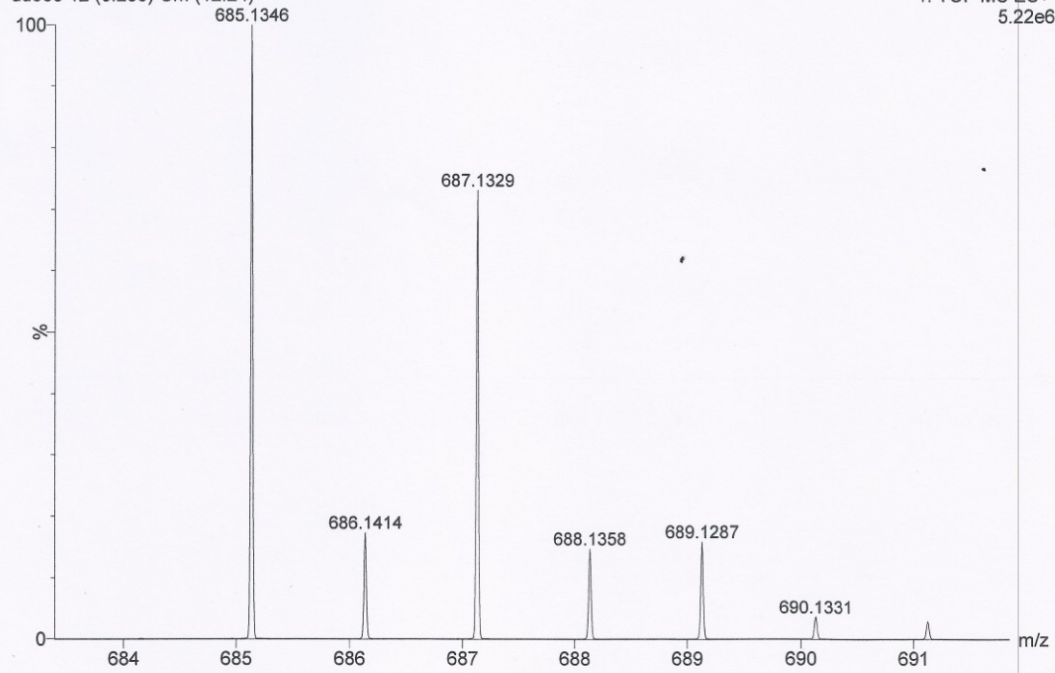



**Fig. S13** ESI-MS of complex **3** in DMSO-acetonitrile as representative of five Ni<sup>II</sup> complexes: (A) simulated and experimental spectra (B) isotopic distribution pattern.

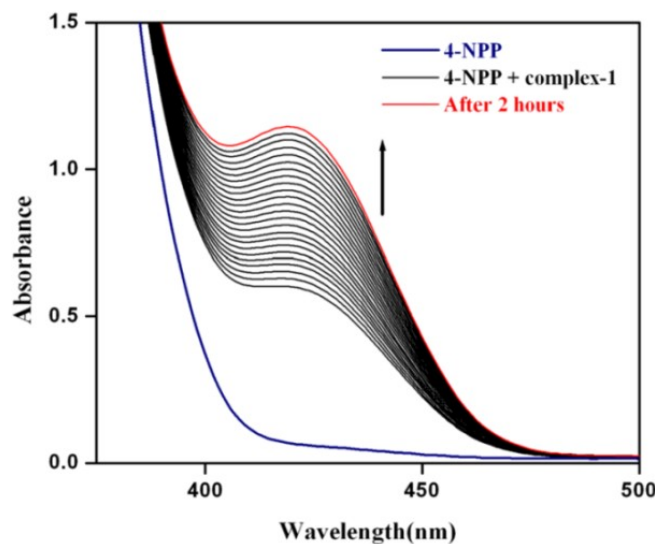

**Fig. 14** Wavelength scan for the hydrolysis of 4-NPP in the absence and presence of complex **1** (substrate:catalyst = 20:1) in 75% DMSO (DMSO : pH 9 buffer = 3 :1) recorded at 25 °C at an interval of 10 min for 2 h. [4-NPP] =  $1 \times 10^{-3}$ (M), [Complex **1**] =  $0.05 \times 10^{-3}$ (M). The arrow shows the change in absorbance with reaction time.

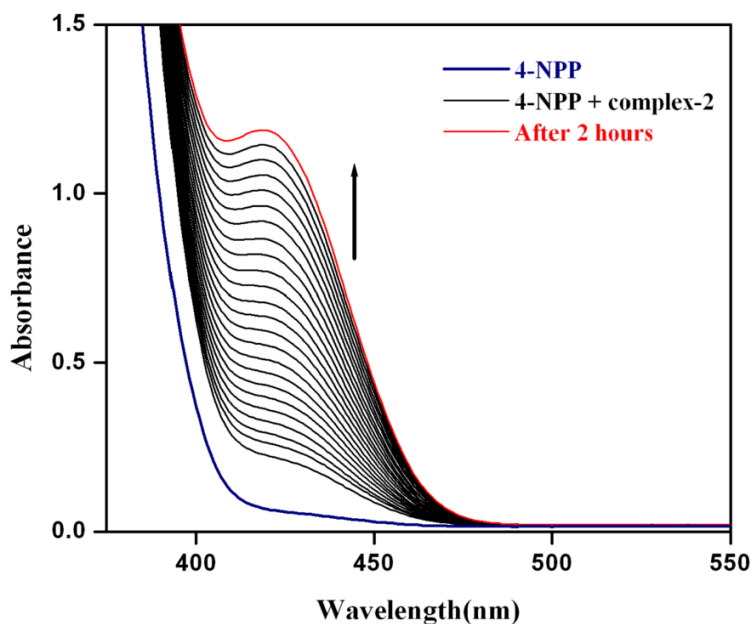

**Fig. S15** Wavelength scan for the phosphatase activity of complex **2** in 75% DMSO (DMSO : pH 9 buffer = 3 :1). [4-NPP] =  $1 \times 10^{-3}$ (M), [Complex **2**] =  $0.05 \times 10^{-3}$ (M).

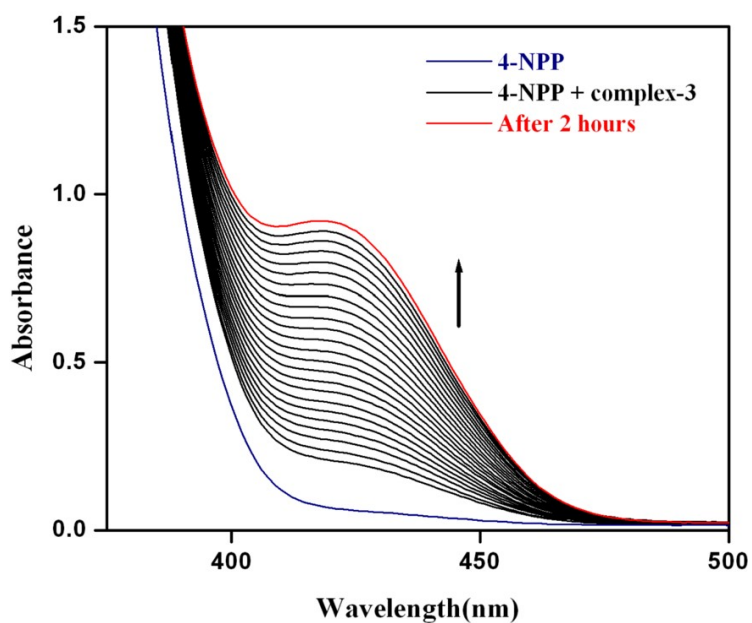

**Fig. S16** Wavelength scan for the Phosphatase activity of complex **3** in 75% DMSO (DMSO : pH 9 buffer = 3 :1). [4-NPP] =  $1 \times 10^{-3}$ (M), [Complex **3**] =  $0.05 \times 10^{-3}$ (M).

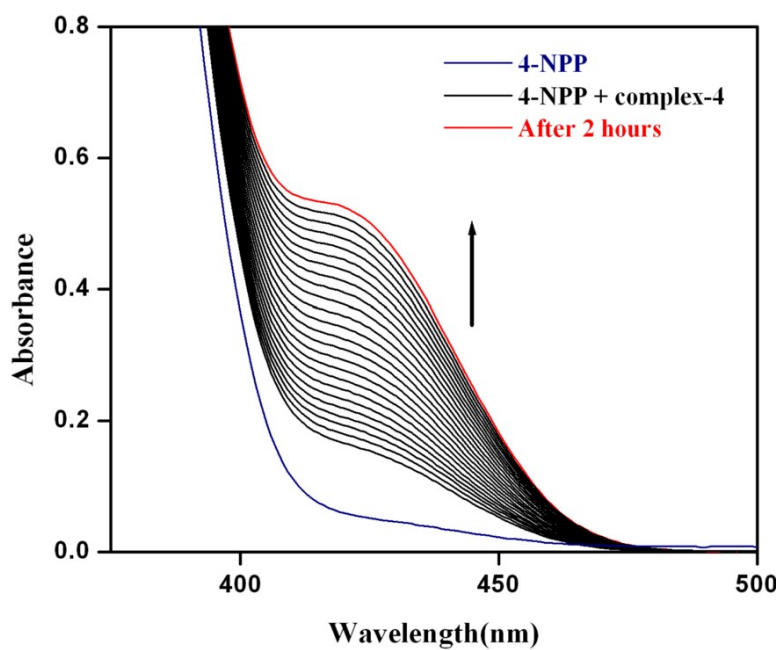

**Fig. S17** Wavelength scan for the phosphatase activity of complex **4** in 75% DMSO (DMSO : pH 9 buffer = 3 :1). [4-NPP] =  $1 \times 10^{-3}$ (M), [Complex **4**] =  $0.05 \times 10^{-3}$ (M).

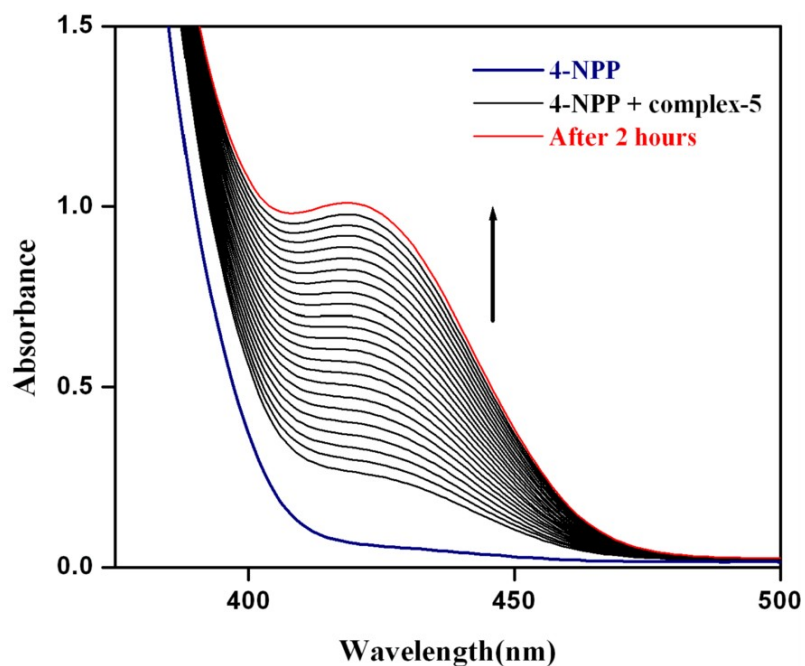

**Fig. S18** Wavelength scan for the phosphatase activity of complex **5** in 75% DMSO (DMSO : pH 9 buffer = 3 :1).  $[4\text{-NPP}] = 1 \times 10^{-3}(\text{M})$ ,  $[\text{Complex } 5] = 0.05 \times 10^{-3}(\text{M})$ .

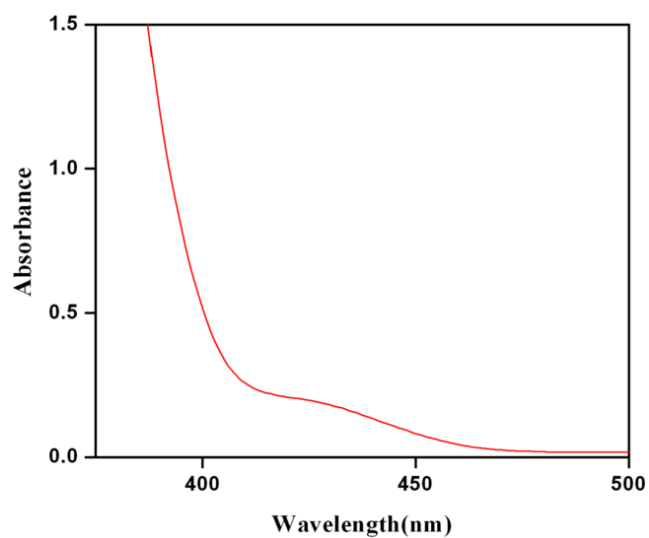

**Fig S19** Control experiment against phosphatase activity with ligand HL<sup>1</sup> in 75% DMSO (DMSO : pH 9 buffer = 3 :1) recorded after 2 hours.

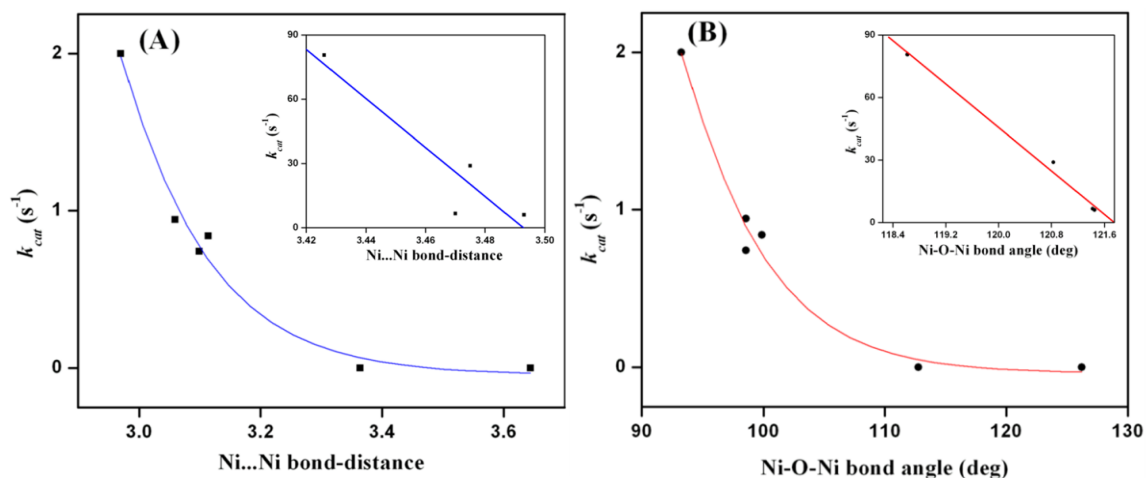

**Fig. S20** Interdependence of  $k_{cat}$  values with (A) Ni<sup>II</sup>-Ni separation and (B) Ni-O-Ni bond angle of previously reported dinuclear Ni<sup>II</sup> complexes. Inset shows the same plot for our Ni<sup>II</sup> complex **1-4** synthesised in this work.

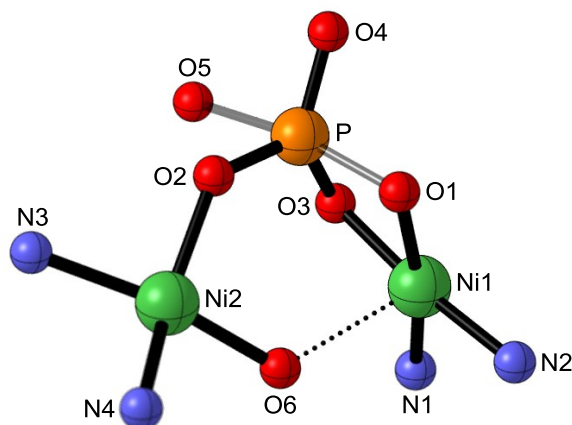

**Fig. S21** Depicted are the labels of the atoms in the active catalysis center.

**Table S1** Molar conductance values of complex **1-5** in DMSO at 298 K.

| Complex  | Molar conductance $\Lambda_M$<br>( $\mu\text{S}$ ) | Nature of electrolyte |
|----------|----------------------------------------------------|-----------------------|
| <b>1</b> | 98                                                 | 1:1                   |
| <b>2</b> | 102                                                | 1:1                   |
| <b>3</b> | 105                                                | 1:1                   |

|   |    |     |
|---|----|-----|
| 4 | 90 | 1:1 |
| 5 | 92 | 1:1 |

**Table S2** Kinetic parameters for phosphatase activity of complex 1-5.

| Complex | $10^4 V_{max}$<br>(M s <sup>-1</sup> ) | Standard<br>error     | $10^3 K_M$<br>(M) | Standard<br>error | $10^{-4} k_{assoc}$<br>(M <sup>-1</sup> ) | $10^{-3} k_{cat}/k_M$<br>(M <sup>-1</sup> s <sup>-1</sup> ) |
|---------|----------------------------------------|-----------------------|-------------------|-------------------|-------------------------------------------|-------------------------------------------------------------|
| 1       | 3.33                                   | $8.62 \times 10^{-4}$ | 5.22              | 0.016             | 0.019                                     | 1.28                                                        |
| 2       | 14.5                                   | $1.17 \times 10^{-3}$ | 30                | 0.001             | 33.33                                     | 0.97                                                        |
| 3       | 40.3                                   | 0.745                 | 69                | 9.72              | 0.014                                     | 1.17                                                        |
| 4       | 3.04                                   | $1.14 \times 10^{-4}$ | 5.62              | 0.003             | 0.018                                     | 1.08                                                        |
| 5       | 4.1                                    | $8.92 \times 10^{-4}$ | 7.6               | 0.018             | 0.013                                     | 1.08                                                        |

**Table S3** First-order Rate Constants for the Hydrolysis of Various Phosphate Esters by Previously Reported Dinuclear Ni<sup>II</sup>Complexes.<sup>a</sup>

| Complex                                                                                                                                                                                                                                                                                 | Ni...Ni (Å) /<br>Ni-O-Ni(°)               | Substrate | Conditions                           | $k_{cat}$ (s <sup>-1</sup> )     | Ref |
|-----------------------------------------------------------------------------------------------------------------------------------------------------------------------------------------------------------------------------------------------------------------------------------------|-------------------------------------------|-----------|--------------------------------------|----------------------------------|-----|
| [Ni <sub>2</sub> (LH <sub>2</sub> )(H <sub>2</sub> O) <sub>2</sub> (OH)(NO <sub>3</sub> )](NO <sub>3</sub> ) <sub>3</sub><br>L=Schiff-base                                                                                                                                              | 2.970/93.26                               | 4-NPP     | MeOH<br>-H <sub>2</sub> O<br>(1:1)   | 2.0                              | 28a |
| [Ni <sub>2</sub> (L <sup>1</sup> )(NCS) <sub>3</sub> (H <sub>2</sub> O) <sub>2</sub> ],<br>[Ni <sub>2</sub> (L <sup>2</sup> )(CH <sub>3</sub> COO)(NCS) <sub>2</sub> (H <sub>2</sub> O)],<br>[Ni <sub>2</sub> (L <sup>3</sup> )(NCS) <sub>3</sub> ]<br>L <sup>1,2,3</sup> = Schiff-base | 3.114/99.86<br>3.059/98.54<br>3.099/98.54 | 4-NPP     | Water-<br>acetoni-<br>trile<br>(1:1) | 0.841<br>0.942<br>0.742          | 28b |
| [Ni <sub>2</sub> L(μ-OH)] (ClO <sub>4</sub> ) <sub>2</sub><br>L = Schiff-base                                                                                                                                                                                                           | -                                         | BNPP      | Water-<br>ethanol<br>(1:1)           | $1.49 \times 10^{-4}$            | 4a  |
| [Ni <sub>2</sub> L <sup>1,2</sup> B](ClO <sub>4</sub> ) <sub>4</sub><br>L <sup>1,2</sup> =polyazamacrobicyclic<br>B = bipy, phen                                                                                                                                                        | -                                         | 4-NPP     | pH 7.2                               | (3.36-10.83)<br>$\times 10^{-5}$ | 28c |

|                                                                                                                                                   |               |      |                                            |                        |     |
|---------------------------------------------------------------------------------------------------------------------------------------------------|---------------|------|--------------------------------------------|------------------------|-----|
| $[\text{Ni}^{\text{II}}_2(\text{L}^1)(\text{O}_2\text{CMe})_2(\text{H}_2\text{O})_2][\text{PF}_6]_3$<br>MeOH.3H <sub>2</sub> O                    | 3.644/126.19  | HPNP | MeOH<br>-H <sub>2</sub> O<br>(33%,<br>v/v) | $16.50 \times 10^{-5}$ | 36a |
| $[\text{Ni}^{\text{II}}_2(\text{L}^2)(\text{O}_2\text{CMe})_2(\text{MeOH})(\text{H}_2\text{O})][\text{ClO}_4]$<br>L <sup>1,2</sup> = Mannich-base | ~3.364/112.78 |      |                                            | $2.96 \times 10^{-5}$  |     |

<sup>a</sup> BNPP= bis(4-nitrophenyl)phosphate; HPNP= 2-hydroxypropyl(4-nitrophenyl)phosphate

**Table S4** Cartesian coordinates of optimized structures.

**Cl-1-H<sub>2</sub>O-RC**

|    |          |          |          |
|----|----------|----------|----------|
| Ni | 2.00429  | -1.86358 | -0.3216  |
| Ni | -0.22215 | 1.48401  | -0.57682 |
| O  | 1.39969  | 0.58473  | -0.27997 |
| N  | 2.29912  | -1.77399 | 1.75411  |
| N  | 3.9311   | -1.67667 | -0.75008 |
| N  | 0.86464  | 2.74482  | -1.69253 |
| N  | -1.89566 | 2.54928  | -0.518   |
| C  | 1.97892  | 1.30709  | 0.67701  |
| C  | 2.38078  | 2.6287   | 0.37127  |
| C  | 2.98789  | 3.42484  | 1.34004  |
| H  | 3.30084  | 4.44016  | 1.11256  |
| C  | 3.20461  | 2.89568  | 2.61351  |
| C  | 2.81102  | 1.59568  | 2.93145  |
| H  | 2.96815  | 1.22265  | 3.93965  |
| C  | 2.18478  | 0.78597  | 1.97627  |
| C  | 1.62096  | -0.56707 | 2.34807  |
| H  | 1.64916  | -0.67349 | 3.44351  |
| H  | 0.57985  | -0.61947 | 2.02446  |
| C  | 1.61815  | -2.97768 | 2.31474  |
| H  | 1.76127  | -3.01667 | 3.40473  |
| H  | 2.02325  | -3.88556 | 1.86414  |
| H  | 0.5581   | -2.93079 | 2.0774   |
| C  | 3.72381  | -1.80089 | 2.17128  |
| H  | 3.77904  | -2.07468 | 3.23591  |
| H  | 4.12844  | -0.7906  | 2.072    |
| C  | 4.57737  | -2.76469 | 1.33851  |
| H  | 5.4953   | -2.9925  | 1.89031  |
| H  | 4.05483  | -3.71726 | 1.18874  |
| C  | 4.93802  | -2.15783 | 0.01005  |
| C  | 6.26964  | -2.05998 | -0.40465 |
| H  | 7.05275  | -2.46785 | 0.22657  |
| C  | 6.57371  | -1.44381 | -1.61483 |
| H  | 7.60471  | -1.35985 | -1.94698 |

|   |           |           |           |
|---|-----------|-----------|-----------|
| C | 5. 52799  | -0. 94198 | -2. 38685 |
| H | 5. 70853  | -0. 45795 | -3. 34101 |
| C | 4. 22365  | -1. 08935 | -1. 92886 |
| H | 3. 36135  | -0. 78931 | -2. 51008 |
| C | 2. 21209  | 3. 06992  | -1. 06009 |
| H | 2. 39161  | 4. 1463   | -1. 1527  |
| H | 2. 96714  | 2. 5655   | -1. 67145 |
| C | 1. 08513  | 1. 9353   | -2. 93497 |
| H | 0. 12908  | 1. 64085  | -3. 37    |
| H | 1. 61988  | 1. 02614  | -2. 6608  |
| H | 1. 66547  | 2. 52042  | -3. 66317 |
| C | 0. 16562  | 4. 01529  | -2. 02581 |
| H | 0. 74613  | 4. 53525  | -2. 80233 |
| H | 0. 17449  | 4. 64152  | -1. 12725 |
| C | -1. 2754  | 3. 82962  | -2. 51303 |
| H | -1. 58893 | 4. 76038  | -2. 99726 |
| H | -1. 34343 | 3. 03808  | -3. 26791 |
| C | -2. 23582 | 3. 51599  | -1. 3995  |
| C | -3. 44134 | 4. 21244  | -1. 27519 |
| H | -3. 6884  | 4. 97466  | -2. 00713 |
| C | -4. 30696 | 3. 92461  | -0. 22443 |
| H | -5. 24771 | 4. 45773  | -0. 12225 |
| C | -3. 93744 | 2. 94277  | 0. 69207  |
| H | -4. 57062 | 2. 67916  | 1. 53219  |
| C | -2. 73169 | 2. 27727  | 0. 50881  |
| H | -2. 41509 | 1. 47932  | 1. 16657  |
| O | -0. 62491 | -3. 70203 | -2. 99156 |
| H | -0. 5879  | -3. 61784 | -3. 95481 |
| H | -1. 0987  | -2. 90287 | -2. 6517  |
| O | -2. 25044 | -2. 16476 | 0. 62663  |
| P | -1. 12418 | -1. 375   | -0. 33508 |
| O | -1. 12618 | 0. 06103  | 0. 28285  |
| O | 0. 11956  | -2. 21531 | 0. 02336  |
| O | -1. 58676 | -1. 42131 | -1. 78665 |
| C | -3. 57306 | -1. 87795 | 0. 7146   |
| C | -4. 26921 | -1. 06615 | -0. 19996 |
| C | -4. 25517 | -2. 45869 | 1. 79949  |
| C | -5. 62357 | -0. 8225  | -0. 00995 |
| H | -3. 75087 | -0. 65102 | -1. 05472 |
| C | -5. 6073  | -2. 219   | 1. 98748  |
| H | -3. 69902 | -3. 09446 | 2. 48027  |
| C | -6. 28319 | -1. 39075 | 1. 08351  |
| H | -6. 17704 | -0. 20077 | -0. 70323 |
| H | -6. 14439 | -2. 65578 | 2. 8205   |
| N | -7. 69872 | -1. 11128 | 1. 28808  |

|    |          |          |          |
|----|----------|----------|----------|
| O  | -8.26885 | -1.64979 | 2.24384  |
| O  | -8.26256 | -0.34221 | 0.49902  |
| O  | 1.76373  | -2.00587 | -2.12113 |
| H  | 1.01046  | -2.60077 | -2.28922 |
| O  | -2.00199 | 0.69948  | -3.48769 |
| H  | -1.84025 | -0.05972 | -2.86844 |
| H  | -2.42002 | 0.30262  | -4.26586 |
| O  | 0.04153  | -5.10616 | -0.46336 |
| H  | -0.15557 | -5.03161 | -1.41486 |
| H  | 0.01584  | -4.17317 | -0.17897 |
| Cl | 3.97382  | 3.89539  | 3.8465   |

### Cl-1-H<sub>2</sub>O-TS

|    |          |          |          |
|----|----------|----------|----------|
| Ni | 1.6057   | -2.02473 | -0.01423 |
| Ni | 0.09661  | 1.4443   | -0.90271 |
| O  | 1.5803   | 0.43705  | -0.31502 |
| N  | 2.27823  | -1.9218  | 1.86139  |
| N  | 3.34707  | -2.24389 | -0.89145 |
| N  | 1.29058  | 2.85311  | -1.678   |
| N  | -1.52573 | 2.59848  | -0.73477 |
| C  | 2.30951  | 1.11336  | 0.57383  |
| C  | 2.92197  | 2.32381  | 0.16495  |
| C  | 3.7145   | 3.06826  | 1.03522  |
| H  | 4.1831   | 3.99204  | 0.70753  |
| C  | 3.91742  | 2.59745  | 2.33085  |
| C  | 3.33841  | 1.40098  | 2.75065  |
| H  | 3.50135  | 1.06304  | 3.77     |
| C  | 2.52727  | 0.64237  | 1.89582  |
| C  | 1.84401  | -0.59115 | 2.44128  |
| H  | 2.01879  | -0.64045 | 3.52467  |
| H  | 0.76528  | -0.54487 | 2.28956  |
| C  | 1.5636   | -2.9847  | 2.63681  |
| H  | 1.93466  | -2.99206 | 3.67136  |
| H  | 1.73971  | -3.96167 | 2.182    |
| H  | 0.49579  | -2.77027 | 2.63803  |
| C  | 3.74602  | -2.10239 | 2.00027  |
| H  | 3.97772  | -2.29944 | 3.05671  |
| H  | 4.23339  | -1.16344 | 1.72614  |
| C  | 4.30339  | -3.23512 | 1.12813  |
| H  | 5.29466  | -3.51131 | 1.50239  |
| H  | 3.67765  | -4.13221 | 1.21534  |
| C  | 4.42293  | -2.82588 | -0.31707 |
| C  | 5.60994  | -3.00289 | -1.03323 |
| H  | 6.45727  | -3.47668 | -0.54798 |
| C  | 5.69378  | -2.56992 | -2.354   |



|   |          |          |          |
|---|----------|----------|----------|
| H | 6.61128  | -2.7049  | -2.91953 |
| C | 4.58188  | -1.95791 | -2.93052 |
| H | 4.59682  | -1.60102 | -3.95487 |
| C | 3.42833  | -1.81521 | -2.16866 |
| H | 2.52113  | -1.36899 | -2.55888 |
| C | 2.73441  | 2.66854  | -1.27959 |
| H | 3.29416  | 3.57091  | -1.55896 |
| H | 3.10525  | 1.83676  | -1.88484 |
| C | 1.16698  | 2.58311  | -3.14294 |
| H | 0.12236  | 2.56336  | -3.45251 |
| H | 1.58239  | 1.59591  | -3.34951 |
| H | 1.72196  | 3.34006  | -3.71681 |
| C | 0.87826  | 4.24388  | -1.35351 |
| H | 1.57685  | 4.9331   | -1.85212 |
| H | 0.99521  | 4.37481  | -0.27295 |
| C | -0.53853 | 4.60696  | -1.79273 |
| H | -0.65363 | 5.68536  | -1.6392  |
| H | -0.65189 | 4.44936  | -2.87248 |
| C | -1.6556  | 3.90526  | -1.06212 |
| C | -2.8173  | 4.61502  | -0.75018 |
| H | -2.88801 | 5.66085  | -1.03273 |
| C | -3.86593 | 3.98377  | -0.08624 |
| H | -4.77407 | 4.52875  | 0.1549   |
| C | -3.71615 | 2.64726  | 0.26776  |
| H | -4.48584 | 2.09618  | 0.79693  |
| C | -2.53685 | 1.99085  | -0.06923 |
| H | -2.38224 | 0.94939  | 0.18455  |
| O | -0.3225  | -4.42984 | -2.53516 |
| H | -0.55001 | -4.5598  | -3.46761 |
| H | -1.09404 | -3.94757 | -2.13192 |
| O | -2.48505 | -1.09411 | 0.85666  |
| P | -0.95798 | -1.59166 | -0.69155 |
| O | -1.02711 | -0.09096 | -1.12333 |
| O | -0.13758 | -1.90254 | 0.6147   |
| O | -1.87552 | -2.57039 | -1.37901 |
| C | -3.79295 | -1.11936 | 0.83232  |
| C | -4.55719 | -1.63719 | -0.25705 |
| C | -4.52014 | -0.57152 | 1.93745  |
| C | -5.93861 | -1.59267 | -0.24164 |
| H | -4.02098 | -2.07883 | -1.08763 |
| C | -5.90119 | -0.52919 | 1.95064  |
| H | -3.9519  | -0.17372 | 2.77453  |
| C | -6.6201  | -1.0345  | 0.8543   |
| H | -6.51457 | -1.98725 | -1.07097 |
| H | -6.44264 | -0.11083 | 2.79144  |

|    |          |          |          |
|----|----------|----------|----------|
| N  | -8.05698 | -0.97129 | 0.85352  |
| O  | -8.63146 | -0.45956 | 1.83198  |
| O  | -8.67373 | -1.42441 | -0.12625 |
| O  | 0.61841  | -1.99353 | -1.63335 |
| H  | 0.50045  | -2.89351 | -2.03129 |
| O  | -1.57793 | 0.85601  | -3.70832 |
| H  | -1.482   | 0.37218  | -2.85611 |
| H  | -2.33496 | 0.4466   | -4.15205 |
| O  | -1.29501 | -1.38747 | 3.36936  |
| H  | -2.04481 | -1.65165 | 3.92152  |
| H  | -1.6636  | -1.31526 | 2.45133  |
| Cl | 4.91563  | 3.52365  | 3.44925  |

### Cl-1-H<sub>2</sub>O-PC

|    |          |          |          |
|----|----------|----------|----------|
| Ni | 1.8054   | -1.99461 | -0.05027 |
| Ni | 0.14788  | 1.40181  | -1.01272 |
| O  | 1.67395  | 0.47333  | -0.38879 |
| N  | 2.2439   | -1.87475 | 1.86917  |
| N  | 3.63234  | -2.13611 | -0.73086 |
| N  | 1.28889  | 2.89601  | -1.70365 |
| N  | -1.54403 | 2.41237  | -0.87498 |
| C  | 2.25099  | 1.18263  | 0.58827  |
| C  | 2.79258  | 2.45232  | 0.26853  |
| C  | 3.43373  | 3.23221  | 1.22792  |
| H  | 3.85004  | 4.2012   | 0.96731  |
| C  | 3.54962  | 2.74304  | 2.52733  |
| C  | 3.02137  | 1.49876  | 2.86607  |
| H  | 3.09847  | 1.15299  | 3.89276  |
| C  | 2.35893  | 0.70338  | 1.92056  |
| C  | 1.68495  | -0.56522 | 2.39115  |
| H  | 1.73969  | -0.61101 | 3.48605  |
| H  | 0.62723  | -0.57336 | 2.12907  |
| C  | 1.4936   | -2.97315 | 2.56182  |
| H  | 1.75196  | -2.9678  | 3.62892  |
| H  | 1.75963  | -3.93848 | 2.12623  |
| H  | 0.42423  | -2.80026 | 2.45489  |
| C  | 3.69429  | -1.98716 | 2.1707   |
| H  | 3.8122   | -2.16662 | 3.24821  |
| H  | 4.16431  | -1.02749 | 1.94217  |
| C  | 4.39757  | -3.09858 | 1.38054  |
| H  | 5.35284  | -3.32457 | 1.86538  |
| H  | 3.80988  | -4.02497 | 1.40773  |
| C  | 4.65791  | -2.68863 | -0.04573 |
| C  | 5.91815  | -2.82649 | -0.6337  |
| H  | 6.72372  | -3.27705 | -0.06297 |

|   |          |          |          |
|---|----------|----------|----------|
| C | 6.12765  | -2.38243 | -1.93661 |
| H | 7.10324  | -2.48658 | -2.4024  |
| C | 5.06651  | -1.79581 | -2.62514 |
| H | 5.18089  | -1.42721 | -3.63887 |
| C | 3.83554  | -1.69234 | -1.9895  |
| H | 2.96784  | -1.26034 | -2.47299 |
| C | 2.70282  | 2.84094  | -1.17486 |
| H | 3.18936  | 3.80622  | -1.36577 |
| H | 3.21524  | 2.08108  | -1.77114 |
| C | 1.31938  | 2.59267  | -3.16762 |
| H | 0.31183  | 2.47802  | -3.56797 |
| H | 1.83695  | 1.64304  | -3.31187 |
| H | 1.8571   | 3.3858   | -3.70782 |
| C | 0.7288   | 4.25073  | -1.4529  |
| H | 1.3845   | 4.98668  | -1.94253 |
| H | 0.77566  | 4.42645  | -0.37319 |
| C | -0.69419 | 4.45568  | -1.97098 |
| H | -0.91231 | 5.52623  | -1.8944  |
| H | -0.74774 | 4.2168   | -3.04008 |
| C | -1.76713 | 3.69981  | -1.23018 |
| C | -2.97607 | 4.32822  | -0.93145 |
| H | -3.12431 | 5.35973  | -1.23574 |
| C | -3.97435 | 3.63393  | -0.25    |
| H | -4.91917 | 4.1159   | -0.01573 |
| C | -3.72896 | 2.31942  | 0.12962  |
| H | -4.45566 | 1.72631  | 0.67396  |
| C | -2.50613 | 1.73958  | -0.19923 |
| H | -2.29832 | 0.7132   | 0.09001  |
| O | 0.14883  | -4.43832 | -2.73    |
| H | -0.00404 | -4.62202 | -3.6689  |
| H | -0.69835 | -4.05271 | -2.38222 |
| O | -2.77175 | -0.97467 | 1.24772  |
| P | -0.60131 | -1.69825 | -1.05234 |
| O | -0.85077 | -0.20251 | -1.36771 |
| O | -0.01628 | -1.94425 | 0.37658  |
| O | -1.57926 | -2.66202 | -1.65271 |
| C | -4.05323 | -1.05114 | 1.14705  |
| C | -4.68325 | -1.48949 | -0.06989 |
| C | -4.93411 | -0.6648  | 2.2176   |
| C | -6.05406 | -1.5103  | -0.20912 |
| H | -4.03394 | -1.82106 | -0.8754  |
| C | -6.3061  | -0.68535 | 2.07555  |
| H | -4.48473 | -0.33746 | 3.15243  |
| C | -6.88101 | -1.09931 | 0.85757  |
| H | -6.5178  | -1.84267 | -1.13112 |

|    |          |          |          |
|----|----------|----------|----------|
| H  | -6.95935 | -0.38315 | 2.8864   |
| N  | -8.30191 | -1.09613 | 0.7038   |
| O  | -9.01077 | -0.72572 | 1.66206  |
| O  | -8.79052 | -1.45875 | -0.38524 |
| O  | 0.95523  | -2.03426 | -1.81052 |
| H  | 0.89172  | -2.9386  | -2.23387 |
| O  | -1.40065 | 0.86759  | -3.91864 |
| H  | -1.33723 | 0.35085  | -3.08481 |
| H  | -2.20469 | 0.55347  | -4.35746 |
| O  | -1.26843 | -1.34203 | 3.46212  |
| H  | -1.88951 | -1.49781 | 4.18779  |
| H  | -1.84598 | -1.21152 | 2.65336  |
| Cl | 4.36039  | 3.71089  | 3.7547   |

**Table S5** Structural parameters and NPA atomic partial charge distribution of selected reaction structures. The labels of the atoms are presented in Fig. S27.

| <b>Structural Parameters</b> | <b>Cl-1-H<sub>2</sub>O-RC</b> | <b>Cl-1-H<sub>2</sub>O -TS</b> | <b>Me-1-H<sub>2</sub>O -TS</b> | <b>CHMe<sub>2</sub>-1-H<sub>2</sub>O -TS</b> | <b>CMe<sub>3</sub>-1-H<sub>2</sub>O -TS</b> | <b>OMe-1-H<sub>2</sub>O -TS</b> |
|------------------------------|-------------------------------|--------------------------------|--------------------------------|----------------------------------------------|---------------------------------------------|---------------------------------|
| B(P-O1)                      | 3.45                          | 1.88                           | 1.88                           | 1.88                                         | 1.88                                        | 1.89                            |
| B(P-O5)                      | 1.68                          | 2.23                           | 2.24                           | 2.23                                         | 2.23                                        | 2.21                            |
| A(O1-P-O5)                   | 140.5                         | 165.8                          | 165.7                          | 165.8                                        | 165.9                                       | 165.8                           |
| D(O2-O3-O4-P)                | -26.1                         | 7.6                            | 7.9                            | 7.7                                          | 7.6                                         | 7.1                             |
| B(Ni1---Ni2)                 | 4.03                          | 3.89                           | 3.86                           | 3.86                                         | 3.86                                        | 3.87                            |
| B(Ni1-O6)                    | 2.52                          | 2.48                           | 2.47                           | 2.47                                         | 2.47                                        | 2.47                            |
| A(Ni1-O6-Ni2)                | 132.0                         | 125.1                          | 124.3                          | 124.1                                        | 124.6                                       | 124.7                           |
| <b>Atomic Partial Charge</b> | <b>Cl-1-H<sub>2</sub>O-RC</b> | <b>Cl-1-H<sub>2</sub>O -TS</b> | <b>Me-1-H<sub>2</sub>O -TS</b> | <b>CHMe<sub>2</sub>-1-H<sub>2</sub>O -TS</b> | <b>CMe<sub>3</sub>-1-H<sub>2</sub>O -TS</b> | <b>OMe-1-H<sub>2</sub>O -TS</b> |
| C(P)                         | 2.568                         | 2.551                          | 2.550                          | 2.549                                        | 2.550                                       | 2.550                           |
| C(O1)                        | -1.034                        | -0.972                         | -0.972                         | -0.973                                       | -0.972                                      | -0.972                          |
| C(O2)                        | -1.107                        | -1.141                         | -1.142                         | -1.143                                       | -1.143                                      | -1.144                          |
| C(O3)                        | -1.121                        | -1.036                         | -1.035                         | -1.037                                       | -1.037                                      | -1.037                          |
| C(Ni1)                       | 0.820                         | 0.777                          | 0.776                          | 0.773                                        | 0.776                                       | 0.772                           |
| C(Ni2)                       | 0.822                         | 0.872                          | 0.864                          | 0.859                                        | 0.865                                       | 0.860                           |

|       |        |        |        |        |        |        |
|-------|--------|--------|--------|--------|--------|--------|
| C(O6) | -0.742 | -0.749 | -0.755 | -0.788 | -0.756 | -0.788 |
|-------|--------|--------|--------|--------|--------|--------|
